# Supplementary material for: Electrochemical properties of TiOx/rGO composite as an electrode for supercapacitors
Source: PubMed Central journal article supplement — RSC Adv. 2019 Sep 4;9(48):27896–903. doi: 10.1039/c9ra04346b (PMC9070778; doi:10.1039/c9ra04346b), 2019-09-04
Supplement: RA-009-C9RA04346B-s001.pdf [file RA-009-C9RA04346B-s001.pdf]

# Electrochemical Properties of $\text{TiO}_x/\text{rGO}$ Composite as an Electrode for Supercapacitor

Retno Maharsi,<sup>\*a</sup> Aditya Farhan Arif<sup>b</sup>, Takashi Ogi<sup>c</sup>, Hendri Widiyandari<sup>a,d</sup>, and Ferry Iskandar<sup>a,e</sup>

*National Center for Sustainable Transportation Technology (NCSTT), Institut Teknologi Bandung, Jl. Ganesa No. 10, Bandung 40132, Indonesia*

*Department of New Investment, PT Rekayasa Industri, Jl. Kalibata Timur I No. 36, Jakarta 12740, Indonesia.*

*Department of Chemical Engineering, Graduate School of Engineering, Hiroshima University, 1-4-1 Kagamiyama, Higashi-Hiroshima, 739-8527, Japan.*

*Department of Physics, Faculty of Mathematics and Natural Sciences, Universitas Sebelas Maret, Jl. Ir. Sutami 36A, Ketingan, Surakarta, 57126, Indonesia*

*Department of Physics, Faculty of Mathematics and Natural Sciences, Institut Teknologi Bandung, Jl. Ganesa No. 10, Bandung 40132, Indonesia*

## Supplementary information

### 1. X-ray diffraction data

#### 1.1. X-ray diffraction pattern of $\text{TiO}_x$ B before and after heating treatment

To prove the crystal stability of the employed  $\text{TiO}_x$ , the crystal structure of  $\text{TiO}_x$  B was observed after a heating treatment in an oven at 80 °C for 1 hour. There is no phase change and the pattern remain same.

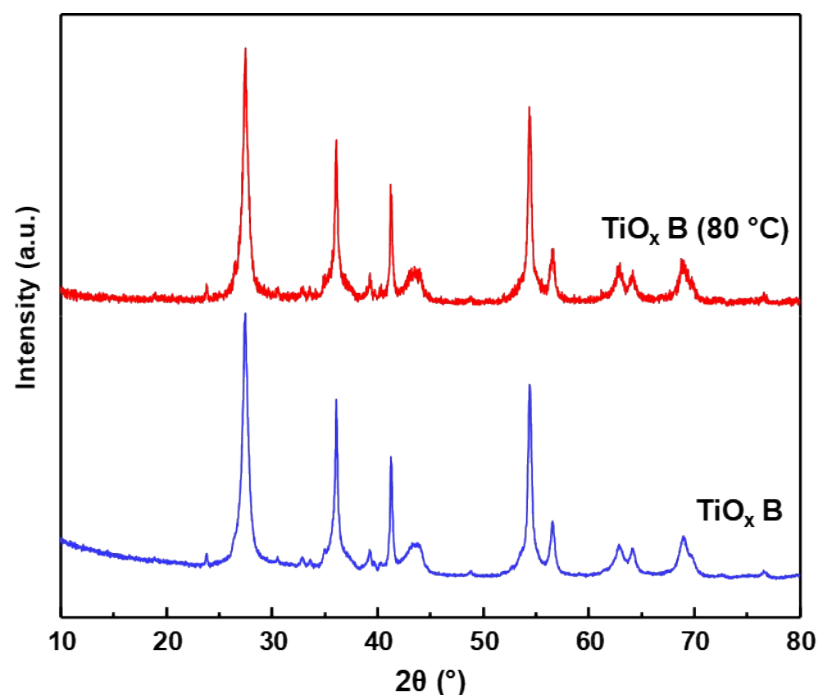

Figure S 1. Diffraction pattern of  $\text{TiO}_x$  B before and after heat treatment in oven at 80 °C

#### 1.2. X-Ray diffraction patterns of rGO and $\text{TiO}_x$ before and after impregnation

To enhance the specific capacitance of  $\text{TiO}_x/\text{rGO}$ , PEDOT:PSS conductive polymer was added to the composite. Addition of PEDOT:PSS does not change the crystal structure of  $\text{TiO}_x/\text{rGO}$ , probably due to its small amount.

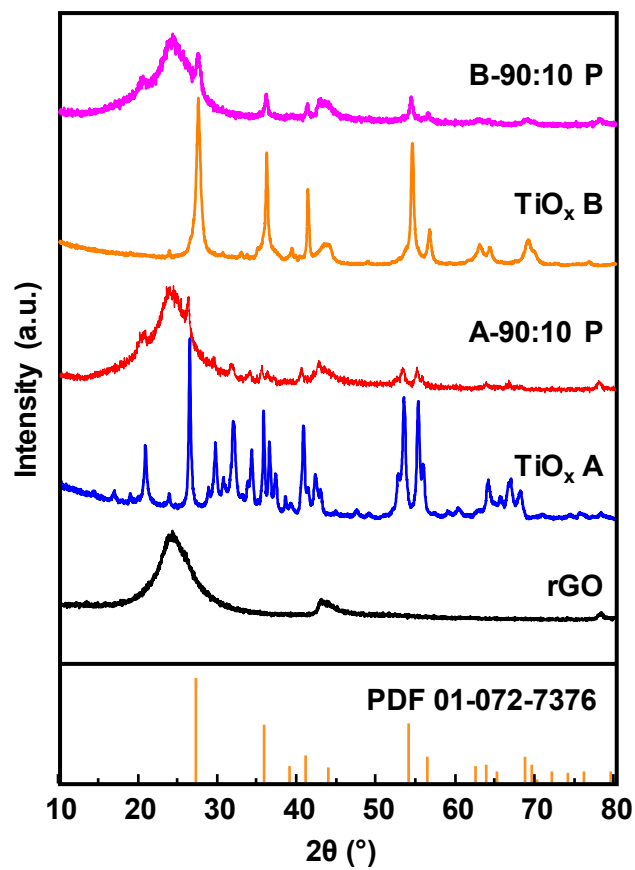

Figure S 2. Diffraction pattern of rGO and TiO<sub>x</sub> before and after impregnation with composition of 90:10.

## 2. Effect of TiO<sub>x</sub> and PEDOT:PSS addition on rGO structure

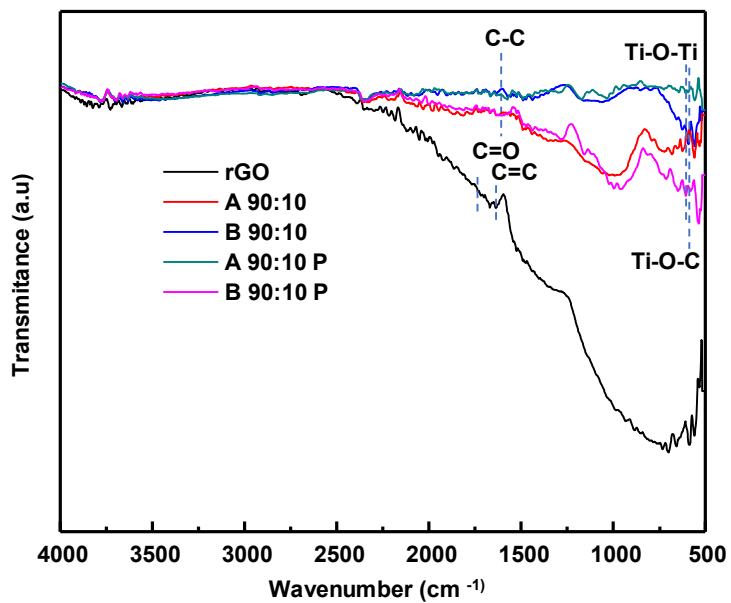

Figure S 3. FTIR spectra of rGO before and after TiO<sub>x</sub> and PEDOT:PSS addition

### 3. Electrochemical properties of TiOx/rGO

#### 3.1. The data fitting of Electrochemical Impedance Spectroscopy (EIS) curves

Table S 1. The resistances value of Sample A and B based on EIS data fitting

| Sample           | TiOx A | A-70:30 | A-90:10 | A-95:5 | TiOx B | B-70:30 | B-90:10 | B-95:5 |
|------------------|--------|---------|---------|--------|--------|---------|---------|--------|
| Rs ( $\Omega$ )  | 3.18   | 2.73    | 1.678   | 2.69   | 2.37   | 4.13    | 2.56    | 4.732  |
| Rct ( $\Omega$ ) | 11.27  | 4.18    | 5.63    | 41.95  | 68.27  | 3.72    | 13.59   | 53.75  |
| Goodness of fit  | 110e-6 | 672e-6  | 3.65e-3 | 787e-6 | 589e-6 | 446e-6  | 6.20e-4 | 140e-6 |

#### 3.2. EIS curves of sample A and B after PEDOT:PSS addition

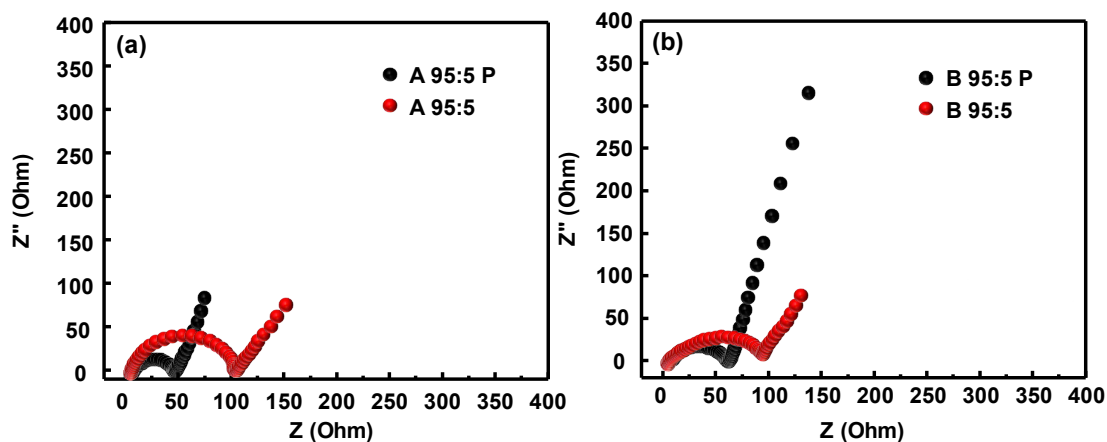

Figure S 4. Nyquist plots of sample (a) A 95:5 and (b) B 95:5 before and after PEDOT:PSS addition

### 4. Sample performance stability

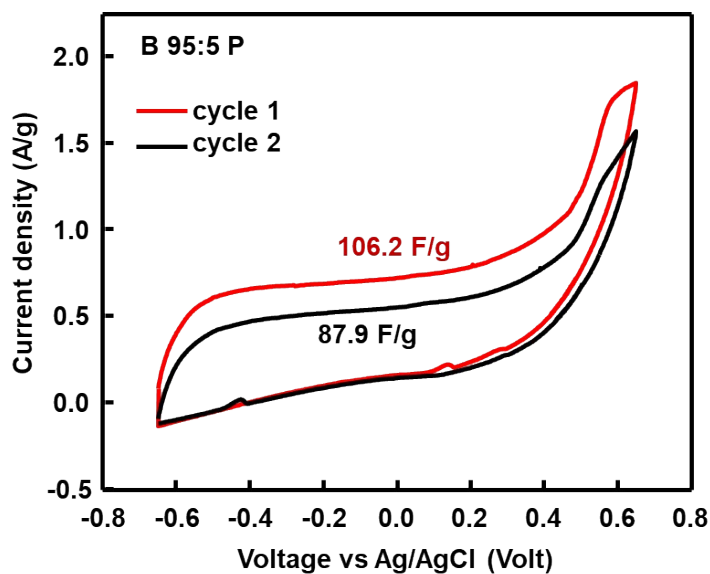

Figure S 5. CV curves of sample B-95:5 P for first and second cycle.

## 5. Crystal structure of Sample B after PEDOT:PSS addition

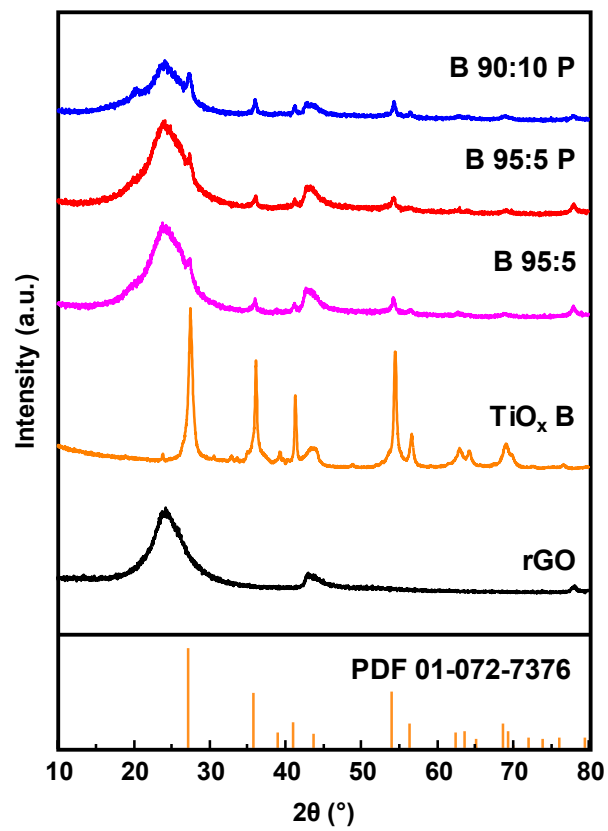

Figure S 6. Diffraction pattern of rGO and TiO<sub>x</sub> B before and after impregnation with rGO/TiO<sub>x</sub> composition of 95:5 (with and without PEDOT:PSS addition) and 90:10 with PEDOT:PSS addition
